# Supplementary material
Source: publisher site journal article supplement (https://www.dovepress.com/get_supplementary_file.php?f=495867.docx)

**Supplementary Table 1: List of Centres that Screened at Least One Patient**

| Dr. med. Azzola, Andrea | Cantonal Hospital Luzern, Pulmonology Clinic, Luzern, Switzerland |
| --- | --- |
| Prof. Dr. med. Bridevaux, Pierre-Olivier | Centre Hospitalier du Valais Romand, Service de Pneumologie, Sion, Switzerland |
| Dr. med. Charbonnier, Florian | University Hospital Geneva (HUG), Pulmonology Division, Geneva, Switzerland |
| Dr. med. Fiechter, René | Pulmonary Specialty Center, Aathal, Switzerland |
| Dr. med. Hauser, Thomas | Immunology Centre Zurich, Zurich, Switzerland |
| Dr. med. Huber, Michael | Hospital Wetzikon (GZO), Pulmonology Clinic, Wetzikon, Switzerland |
| Dr. med. Jandus, Peter | University Hospital Geneva (HUG), Immunology and Allergology Division, Geneva, Switzerland |
| Prof. Dr. med. Leuppi, Jörg D. | Cantonal Hospital Baselland, University Centre of Internal Medicine, Liestal, Switzerland |
| Dr. med. Pavlov, Nikolay | Department for Pulmonary Medicine, Allergology and Clinical Immunology, University Hospital Bern, Bern, Switzerland |
| Dr. med. Piecyk, Andreas | Pulmonary Center Hirslanden, Zurich, Switzerland |
| Dr. med. Rothe, Thomas | Cantonal Hospital Graubünden, Pulmonology Clinic, Chur, Switzerland |
| Prof. Dr. med. Stolz, Daiana | University Hospital Basel, Pulmonology Clinic, Basel, Switzerland |
| Dr. med. Scherer, Thomas | Pulmonary Clinic Bethanien, Zurich, Switzerland |

**Supplementary Table 2: Non-serious adverse events by system organ class (SOC) and preferred terms (PT)**

| **System organ class (SOC)** | **Preferred term (PT)** | **Number of patients** | |
| --- | --- | --- | --- |
| N | % |
| Cardiac disorders | Arteriospasm coronary | 1 | 1.4 |
| Ear and labyrinth disorders | Ear pain | 1 | 1.4 |
| Ear discomfort | 1 | 1.4 |
| Eye disorders | Retinal vascular thrombosis | 1 | 1.4 |
| Gastrointestinal disorders | Abdominal pain upper | 1 | 1.4 |
| Diarrhoea | 1 | 1.4 |
| Dysphagia | 1 | 1.4 |
| Gastroesophageal reflux disease | 1 | 1.4 |
| Oral pain | 1 | 1.4 |
| Vomiting | 1 | 1.4 |
| Tongue discomfort | 1 | 1.4 |
| General disorders and administration site conditions | Asthenia | 2 | 2.7 |
| Burning sensation | 1 | 1.4 |
| Chest discomfort | 4 | 5.5 |
| Chest pain | 3 | 4.1 |
| Chills | 3 | 4.1 |
| Fatigue | 5 | 6.8 |
| Influenza like illness | 1 | 1.4 |
| Injection site paraesthesia | 1 | 1.4 |
| Oedema | 1 | 1.4 |
| Pyrexia | 3 | 4.1 |
| Injection site hypoaesthesia | 1 | 1.4 |
| Immune system disorders | Periorbital oedema | 1 | 1.4 |
| Seasonal allergy | 1 | 1.4 |
| Infections and infestations | Bronchitis | 3 | 4.1 |
| Herpes zoster | 1 | 1.4 |
| Infection | 1 | 1.4 |
| Nasopharyngitis | 7 | 9.6 |
| Oral candidiasis | 1 | 1.4 |
| Rhinitis | 1 | 1.4 |
| Sinusitis | 2 | 2.7 |
| Sputum purulent | 1 | 1.4 |
| Pneumonia bacterial | 1 | 1.4 |
| Respiratory tract infection | 1 | 1.4 |
| COVID-19 | 3 | 4.1 |
| Suspected COVID-19 | 1 | 1.4 |
| Injury, poisoning and procedural complications | Alcohol poisoning | 1 | 1.4 |
| Infusion related reaction | 1 | 1.4 |
| Bone contusion | 1 | 1.4 |
| Investigations | Peak expiratory flow rate decreased | 1 | 1.4 |
| Rheumatoid factor positive | 1 | 1.4 |
| Weight increased | 1 | 1.4 |
| SARS-CoV-2 test positive | 1 | 1.4 |
| SARS-CoV-2 test false positive | 2 | 2.7 |
| Musculoskeletal and connective tissue disorders | Arthralgia | 3 | 4.1 |
| Back pain | 1 | 1.4 |
| Muscle spasms | 1 | 1.4 |
| Myalgia | 1 | 1.4 |
| Pain in extremity | 2 | 2.7 |
| Polyarthritis | 1 | 1.4 |
| Musculoskeletal chest pain | 1 | 1.4 |
| Nervous system disorders | Ageusia | 2 | 2.7 |
| Anosmia | 1 | 1.4 |
| Dysgeusia | 1 | 1.4 |
| Headache | 6 | 8.2 |
| Hypoaesthesia | 1 | 1.4 |
| Somnolence | 1 | 1.4 |
| Tremor | 1 | 1.4 |
| Psychiatric disorders | Depression | 1 | 1.4 |
| Reproductive system and breast disorders | Heavy menstrual bleeding | 1 | 1.4 |
| Respiratory, thoracic and mediastinal disorders | Asthma | 18 | 24.7 |
| Cough | 9 | 12.3 |
| Dysphonia | 2 | 2.7 |
| Dyspnoea | 12 | 16.4 |
| Epistaxis | 1 | 1.4 |
| Nasal congestion | 2 | 2.7 |
| Nasal polyps | 2 | 2.7 |
| Parosmia | 1 | 1.4 |
| Productive cough | 2 | 2.7 |
| Rhinorrhoea | 4 | 5.5 |
| Rhonchi | 1 | 1.4 |
| Viral upper respiratory tract infection | 1 | 1.4 |
| Wheezing | 1 | 1.4 |
| Obstructive airways disorder | 1 | 1.4 |
| Oropharyngeal pain | 4 | 5.5 |
| NSAID exacerbated respiratory disease | 1 | 1.4 |
| Skin and subcutaneous tissue disorders | Alopecia | 1 | 1.4 |
| Eczema | 1 | 1.4 |
| Pruritus | 2 | 2.7 |
| Rash | 2 | 2.7 |

**Supplementary Table 3: Serious adverse events by system organ class (SOC) and preferred terms (PT)**

| **System organ class (SOC)** | **Preferred term (PT)** | **Number of patients** | |
| --- | --- | --- | --- |
| N | % |
| Cardiac disorders | Acute myocardial infarction | 1 | 1.4 |
| General disorders and administration site conditions | Chest pain | 2 | 2.7 |
| Infections and infestations | Erysipelas | 1 | 1.4 |
| Gastroenteritis yersinia | 1 | 1.4 |
| Pneumonia | 1 | 1.4 |
| Postoperative wound infection | 1 | 1.4 |
| Septic shock | 1 | 1.4 |
| Pneumonia bacterial | 1 | 1.4 |
| Investigations | Bronchoscopy | 1 | 1.4 |
| Sputum abnormal | 1 | 1.4 |
| Neoplasms benign, malignant and unspecified | Basal cell carcinoma | 1 | 1.4 |
| Squamous cell carcinoma | 1 | 1.4 |
| Nervous system disorders | Generalised tonic-clonic seizure | 1 | 1.4 |
| Syncope | 1 | 1.4 |
| Respiratory, thoracic and mediastinal disorders | Asthma | 6 | 8.2 |
| Dyspnoea | 1 | 1.4 |
| Chronic rhinosinusitis with nasal polyps | 1 | 1.4 |
| Skin and subcutaneous tissue disorders | Actinic keratosis | 1 | 1.4 |
| Surgical and medical procedures | Appendicectomy | 1 | 1.4 |
| Breast reconstruction | 1 | 1.4 |
| Rehabilitation therapy | 1 | 1.4 |
| Hernia repair | 1 | 1.4 |
| Thyroidectomy | 1 | 1.4 |

**Supplementary Table 4: Benralizumab-related events by system organ class (SOC) and preferred terms (PT)**

| **System organ class (SOC)** | **Preferred term (PT)** | **Number of patients** | |
| --- | --- | --- | --- |
| N | % |
| General disorders and administration site conditions | Asthenia | 2 | 2.7 |
| Chills | 2 | 2.7 |
| Fatigue | 2 | 2.7 |
| Injection site paraesthesia | 1 | 1.4 |
| Pyrexia | 3 | 4.1 |
| Injection site hypoaesthesia | 1 | 1.4 |
| Immune system disorders | Periorbital oedema | 1 | 1.4 |
| Injury, poisoning and procedural complications | Infusion related reaction | 1 | 1.4 |
| Bone contusion | 1 | 1.4 |
| Musculoskeletal and connective tissue disorders | Arthralgia | 2 | 2.7 |
| Muscle spasms | 1 | 1.4 |
| Myalgia | 1 | 1.4 |
| Nervous system disorders | Ageusia | 1 | 1.4 |
| Anosmia | 1 | 1.4 |
| Dysgeusia | 1 | 1.4 |
| Headache | 4 | 5.5 |
| Tremor | 1 | 1.4 |
| Skin and subcutaneous tissue disorders | Pruritus | 2 | 2.7 |

**Supplementary Figure 1**: Changes in fraction of patients according to asthma control levels (ACQ-5) over time.


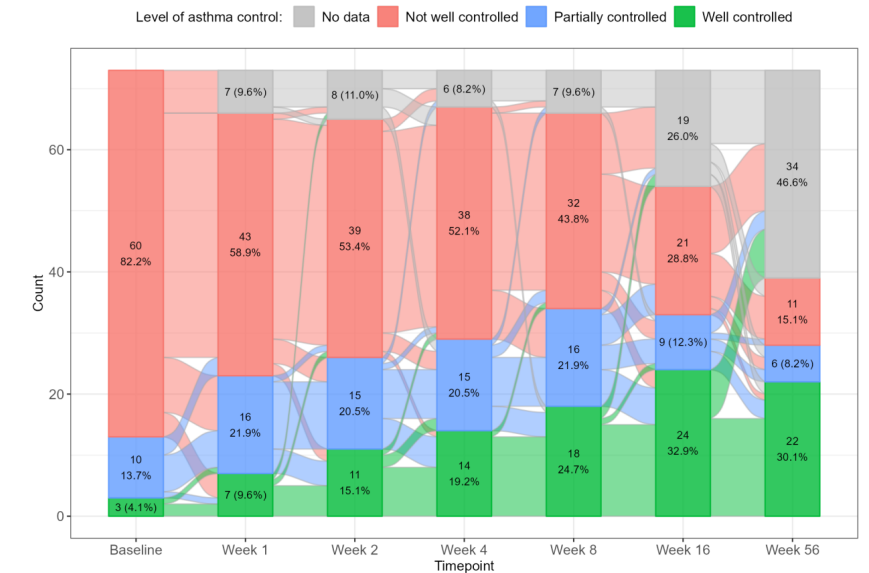


**Supplementary Figure 2**: **PGI-S over time.** Development of PGI-S in percent of patient response over the course of the study (transfer bands depict changes in flow over time).


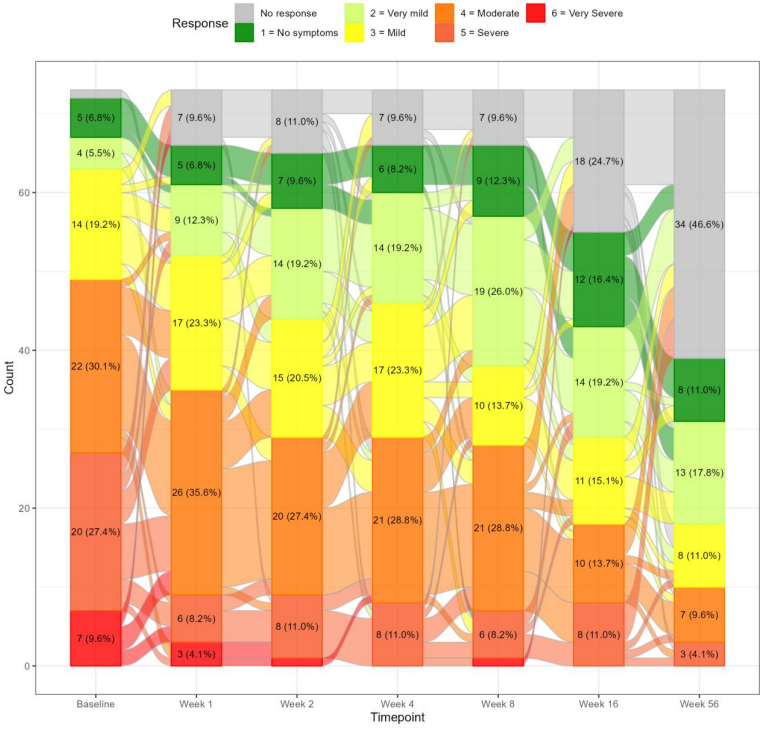


**Supplementary Figure 3: PGI-C over time.** Development of changes compared to baseline (in percent of patient response) over the course of the study (transfer bands depict changes in flow over time).


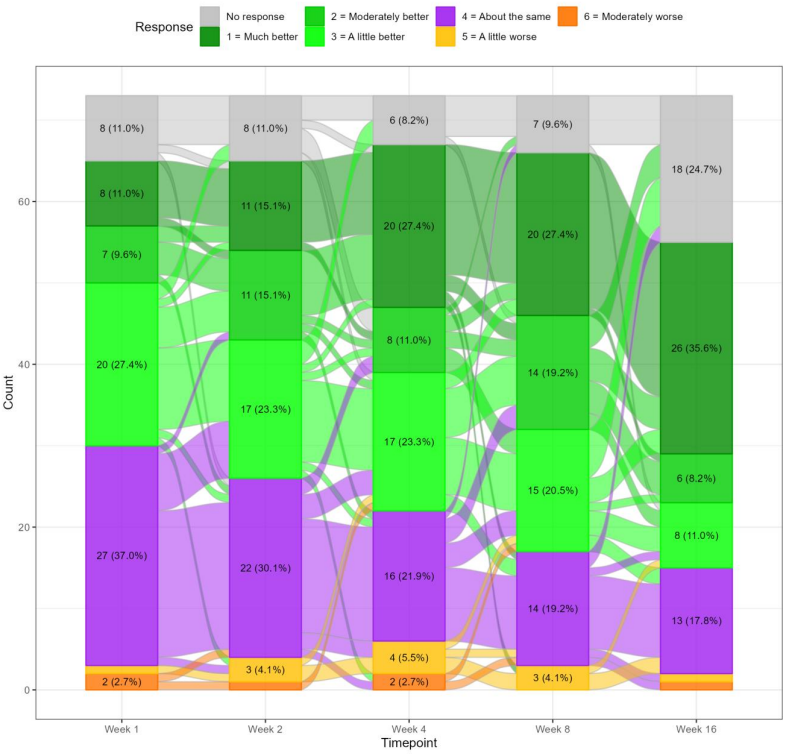

Supplement: Supplementary file 1 [file get_supplementary_file.php]
